# Supplementary material
Source: Springer Nature journal article supplement (https://www.springermedizin.de/resource/supplementary/13012_2011_446_MOESM2_ESM.pdf/9629766)

Blood pressure control message (Diastolic & Systolic)

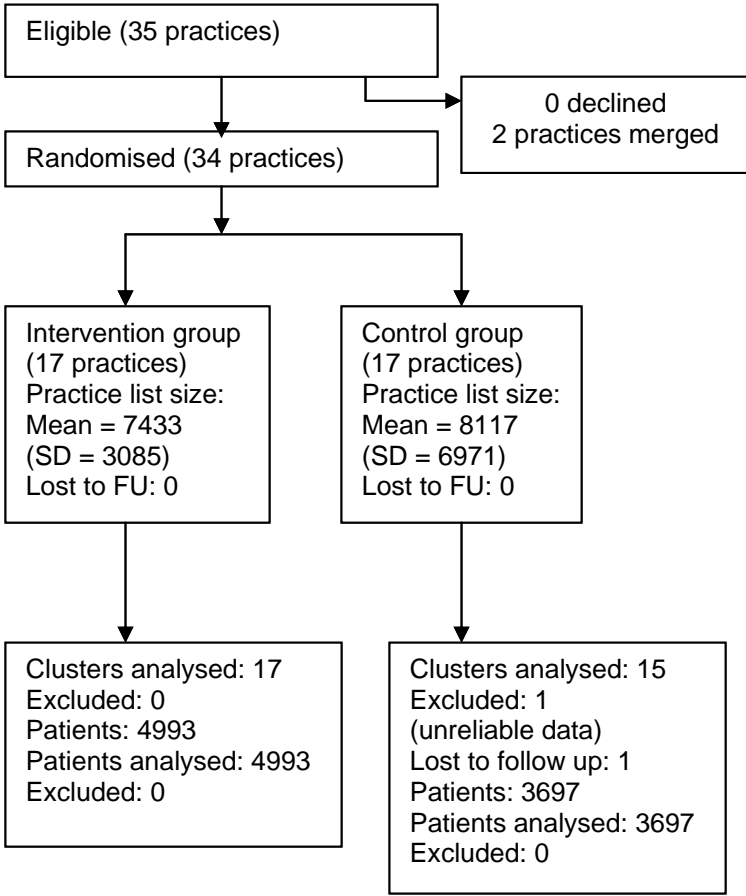

Foot examination message

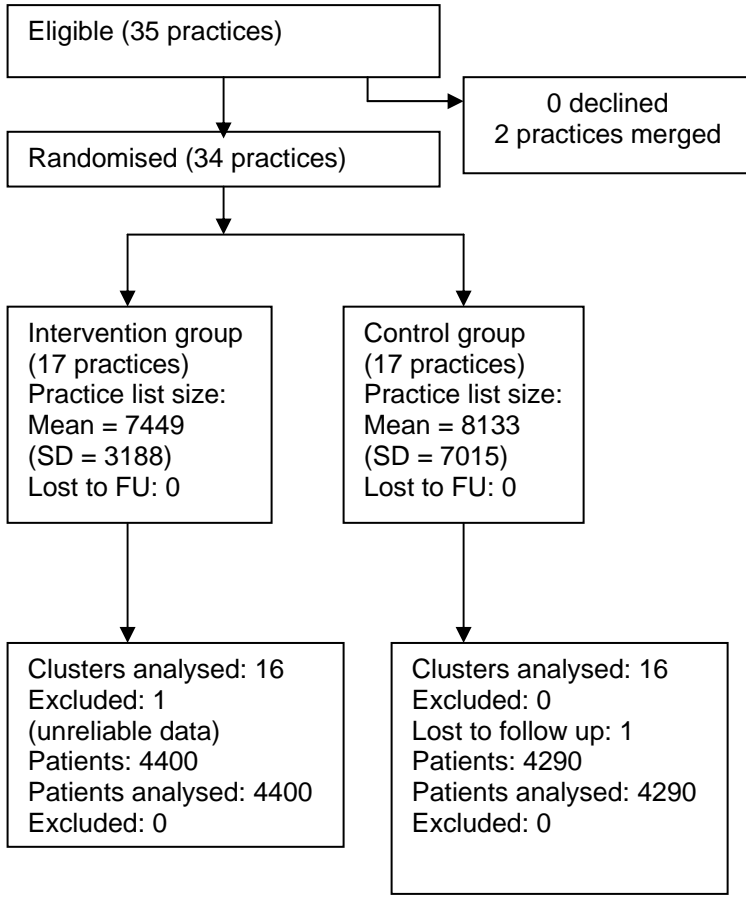

Supplement: MOESM2 [file 9629766]
